# Supplementary material for: Ligand-field excited states of hexacyanochromate and hexacyanocobaltate as sensitisers for near-infrared luminescence from Nd(iii) and Yb(iii) in cyanide-bridged d–f assemblies
Source: Royal Society of Chemistry journal article supplement (doi:10.1039/b708683k), 2007-09-26
Supplement: b708683k.pdf [file b708683k.pdf]

## Ligand-field excited states of hexacyanochromate and hexacyanocobaltate as sensitisers for near-infrared luminescence from Nd(III) and Yb(III) in cyanide-bridged d-f assemblies

Theodore Lazarides,<sup>a</sup> Graham M. Davies,<sup>a</sup> Harry Adams,<sup>a</sup> Cristiana Sabatini,<sup>b</sup> Francesco Barigelletti,<sup>b</sup> Andrea Barbieri,<sup>\*,b</sup> Simon J. A. Pope,<sup>d</sup> Stephen Faulkner,<sup>c</sup> and Michael D. Ward<sup>\*,a</sup>

**Photoinduced energy transfer within  $[M(CN)_4(\mu-CN)_2Ln(H_2O)_2(dmf)_4] \cdot nH_2O$  species,  $M = Co(III)$  and  $Cr(III)$ ,  $Ln = Gd(III)$ ,  $Nd(III)$ , and  $Yb(III)$ .**

The energy transfer rate constant for the dipole-dipole (Förster) mechanism,  $k_{en}^F$ , can be estimated by using spectroscopic quantities and according to the following equations.<sup>15</sup>

$$k_{en}^F = \frac{8.8 \times 10^{-25} K^2 \phi}{n^4 \tau d_{MM}^6} J_F \quad (1)$$

$$J_F = \frac{\int F(\bar{\nu}) \epsilon(\bar{\nu}) / \bar{\nu}^4 d\bar{\nu}}{\int F(\bar{\nu}) d\bar{\nu}} \quad (2)$$

where  $K^2$  is a geometric factor ( $K^2 = 2/3$  for statistical reasons),  $\phi$  and  $\tau$  are the luminescence quantum yield and lifetime of the donor, respectively,  $n$  is the refractive index of the medium (taken  $n = 2$  for our solid samples) and  $J_F$  is the Förster overlap integral between the luminescence spectrum of the donor,  $F(\bar{\nu})$  and the absorption spectrum of the acceptor,  $\epsilon(\bar{\nu})$ , on an energy scale ( $cm^{-1}$ ). For the cases of **Co-Nd** and **Co-Yb**, Table SI\_1 lists values for the pertinent parameters and results.

In order to estimate the exchange rate constant (Dexter),<sup>16</sup>  $k_{en}^D$ , the following equations can be employed in the presence of a weak interaction,  $H$ , between the donor and acceptor units;  $J_D$  is the Dexter integral.

$$k_{en}^D = \frac{4\pi^2 H^2}{h} J_D \quad (3)$$

$$J_D = \frac{\int F(\bar{\nu}) \epsilon(\bar{\nu}) d\bar{\nu}}{\int F(\bar{\nu}) d\bar{\nu} \int \epsilon(\bar{\nu}) d\bar{\nu}} \quad (4)$$

For the **Co-Nd** and **Co-Yb** cases, the emission of the donor unit (**Co**) is available from the **Co-Gd** spectroscopy (see main text) and the extinction coefficient profile,  $\epsilon(\bar{\nu})$ , of the **Nd** and **Yb** units has been evaluated based on the available absorption profiles (Figure 2), and using the measured peak values  $\epsilon_{794}^{\text{Nd}} = 12.6 \text{ M}^{-1} \text{ cm}^{-1}$  and  $\epsilon_{975}^{\text{Yb}} = 2.1 \text{ M}^{-1} \text{ cm}^{-1}$  for water solutions of  $\text{NdCl}_3 \cdot 6\text{H}_2\text{O}$  and  $\text{Yb}(\text{NO}_3)_3 \cdot 6\text{H}_2\text{O}$  as reference compounds. Computations were performed with the help of Matlab 5.2 (MatWorks).

| <b>Table SI_1:</b> Parameters used to evaluate the energy transfer features within the <b>Co-Nd</b> and <b>Co-Yb</b> complexes |                                                   |     |
|--------------------------------------------------------------------------------------------------------------------------------|---------------------------------------------------|-----|
|                                                                                                                                |                                                   | ref |
| <b>Co-Ln</b>                                                                                                                   |                                                   |     |
| Intercenter distance                                                                                                           | 5.6 Å                                             |     |
| $\phi$ (Co)                                                                                                                    | 0.1                                               | 10g |
| $\tau$ (Co)                                                                                                                    | 630 ns                                            |     |
| <b>Co-Nd</b>                                                                                                                   |                                                   |     |
| $J_F$                                                                                                                          | $6.4 \times 10^{-17} \text{ cm}^3 \text{ M}^{-1}$ |     |
| $R_c$                                                                                                                          | 7.8 Å                                             |     |
| $k_{en}^F$ (5.6 Å)                                                                                                             | $1.6 \times 10^7 \text{ s}^{-1}$                  |     |
| $J_D$                                                                                                                          | $1.1 \times 10^{-4} \text{ cm}$                   |     |
| <b>Co-Yb</b>                                                                                                                   |                                                   |     |
| $J_F$                                                                                                                          | $5.2 \times 10^{-18} \text{ cm}^3 \text{ M}^{-1}$ |     |
| $R_c$                                                                                                                          | 5.2 Å                                             |     |
| $k_{en}^F$ (5.6 Å)                                                                                                             | $1.3 \times 10^6 \text{ s}^{-1}$                  |     |
| $J_D$                                                                                                                          | $5.4 \times 10^{-5} \text{ cm}$                   |     |
|                                                                                                                                |                                                   |     |
